# Supplementary material
Source: Springer Nature journal article supplement (https://www.springermedizin.de/resource/supplementary/13063_2014_2259_MOESM2_ESM.pdf/9621756)

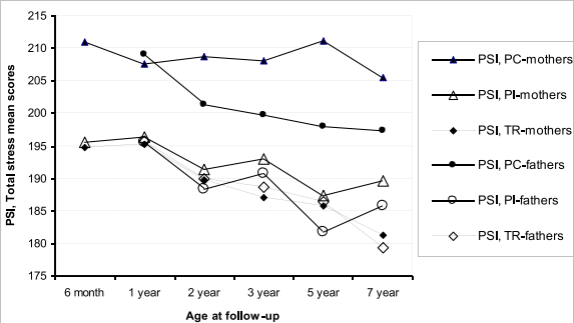

Supplement: MOESM2 [file 9621756]
